# Supplementary material for: Mechanically stabilized UiO-66-NH2-MB screen printed carbon electrode for high-performance electrochemical ratiometric quantification of miR-21-5p
Source: Royal Society of Chemistry journal article supplement (doi:10.1039/d4an01302f), 2024-11-20
Supplement: d4an01302f1.pdf [file d4an01302f1.pdf]

## Supporting Information

### **Mechanically Stabilized UiO-66-NH<sub>2</sub>/MB Screen Printed Carbon Electrode for High Performance Electrochemical Ratiometric of Quantification miR-21-5p**

Jianjing Shen<sup>a</sup>, Li Yan<sup>a</sup>, Jun Pang<sup>b</sup>, Zhenyu Chu<sup>b</sup>, Ying Xie<sup>a</sup>, Shan Huang<sup>a,\*</sup>, Xiaojun Chen<sup>a,\*</sup>

<sup>a</sup> College of Chemistry and Molecular Engineering, Nanjing Tech University, Nanjing 211816, PR China.

<sup>b</sup> College of Chemical Engineering, Nanjing Tech University, Nanjing 211816, PR China.

E-mail: huangshan@njtech.edu.cn; chenxj@njtech.edu.cn

## Content

|                           |     |
|---------------------------|-----|
| Experimental section..... | 1-3 |
| Figure S1.....            | 4   |
| Figure S2.....            | 5   |
| Figure S3.....            | 6   |
| Figure S4.....            | 7   |
| Figure S5.....            | 8   |

**Materials and reagent.** DNA Marker (25-500 bp), 4SGelblue, Acryl/Bis 40% Solution (37.5:1), 50X TBE Buffer, 5X TBE Buffer, 6X DNA Loading Dye, TBE buffer, TAE buffer, Premixed Powder (1X), 1,2-bis(dimethylamino)-ethane (TEMED) and all DNA sequences were synthesized and purified by Sangon Biotechnology Co., Ltd. (Shanghai, China). The chloroauric acid ( $\text{HAuCl}_4 \cdot 4\text{H}_2\text{O}$ ) was obtained from Beijing Huawei Ruike Chemical Co., Ltd. (Beijing, China), Sodium phosphate dibasic dodecahydrate ( $\text{Na}_2\text{HPO}_4 \cdot 12\text{H}_2\text{O}$ ) and sodium phosphate monobasic dihydrate ( $\text{NaH}_2\text{PO}_4 \cdot 2\text{H}_2\text{O}$ ) were obtained from Xilong Chemical Industry Co., Ltd. (Shanghai, China). Benzoic acid ( $\text{C}_7\text{H}_6\text{O}_2$ ) was purchased from Lingfeng Chemical Reagent Co., Ltd. (Shanghai, China). Zirconium tetrachloride ( $\text{ZnCl}_4$ ) was bought from Yi En Chemical Technology Co., Ltd. (Shanghai, China). N, N-dimethylformamide ( $\text{C}_3\text{H}_7\text{NO}$ ) was gotten from Sinopharm Chemical Reagent Co., Ltd. (China). 2-amino-terephthalic acid ( $\text{C}_8\text{H}_7\text{NO}_4$ ) was acquired from Anhui Zesheng Technology Co., Ltd. (Anhui, China). Methylene blue ( $\text{C}_{16}\text{H}_{18}\text{ClN}_3\text{S} \cdot 3\text{H}_2\text{O}$ ) was supported by Tianjin Institute of Chemical Reagents. (Tianjin, China). Methyl alcohol ( $\text{CH}_4\text{O}$ ) was ordered from Wuxi Yasheng Chemical Co., Ltd. (Wuxi, China). 6-mercapto-1-hexanol (MCH) was bought from TCI Chemical Industry Development Co., Ltd. (Shanghai, China).

**Apparatus.** The data of XRD was acquired by a Zelss Sigma300 (German) diffractometer. The polyacrylamide gel electrophoresis (PAGE) and agarose gel electrophoresis (AGE) were imaged with a BIO-RAD ChemiDoc XRs (Tanon, China). The electrode surface conductivity and electrochemical signal were determined on CHI660D (Chen-Hua, China). Fourier transform infrared (FT-IR) spectra were recorded on a Nicolet iS5 spectrophotometer using the KBr pellet technique. UV-vis spectra were performed on a LAMBDA950 spectrophotometer (PerkinElmer, USA). Scanning electron microscopic (SEM) images were obtained from a Zelss Sigma300 scanning electron microscope.

## **Polyacrylamide gel electrophoresis**

12% polyacrylamide gel electrophoresis was employed to verify the feasibility of the signal amplification strategy. Electrophoresis was performed in 1×TBE buffer at 150 V for 45 min. Preparation of samples by mixing 12  $\mu$ L reaction product with 3  $\mu$ L 6×loading buffer. After staining with 4SGelblue, the gel was imaged using the Tanon Imager (Tanon MINI SPACE 1000).

## **Electrochemical detection settings**

All electrochemical experiments were performed on a CHI660D electrochemical workstation for cyclic voltammetry (CV), electrochemical impedance spectra (EIS), amperometric *i-t* and differential pulse voltammetry (DPV) detections. Electrochemical experiments were performed on a three electrodes system with a UiO-66-NH<sub>2</sub>-MB/SPCE as working electrode, a platinum electrode as the counter electrode, and a saturated calomel reference electrode (SCE) as the reference electrode. The CV used for verification of Au electrode surface modification was scanned at a rate of 100 mV/s from -0.6 V to +0.8 V. The DPV used for characterization of  $I_{FC}/I_{MB}$  signal was scanned from -0.4 V to 0.4 V. Error bars showed the standard deviation of three individual tests.

## **Optimization of the ratio of H<sub>1</sub>: miR-21-5p (T), H<sub>1</sub>: miR-21-5p (T):H<sub>2</sub> and H<sub>1</sub>: miR-21-5p (T): H<sub>2</sub>: H<sub>3</sub>**

CHA, the simplification strategy of this research, plays an important role in the performance of the constructed biosensor. To improve the sensitivity of the electrode, the concentration of DNA and miR-21-5p was optimized in this study. In which, H<sub>1</sub>: T=5:1, 2:1, 1:1, 1:2, 1:5, H<sub>1</sub>+T:H<sub>2</sub>=2:1, 1:1,1:2, 1:3, H<sub>1</sub>+T+H<sub>2</sub>:H<sub>3</sub>=2:1, 1:1, 1:1.5, 1:2, 1:3 respectively. The reaction was carried out at 37 °C for 2 h, and then terminated in a refrigerator at 4 °C for 1 h.

## **Fabrication the electrode for miR-21-5p detection**

In order to explore the construction of UiO-66-NH<sub>2</sub>-MB/AuNPs/MCH/H<sub>1</sub>/SPCE and its detection ability of miR-21-5p, CV curves of [Fe(CN)<sub>6</sub>]<sup>3-/4-</sup> was used to study the characteristics of the modified electrode.

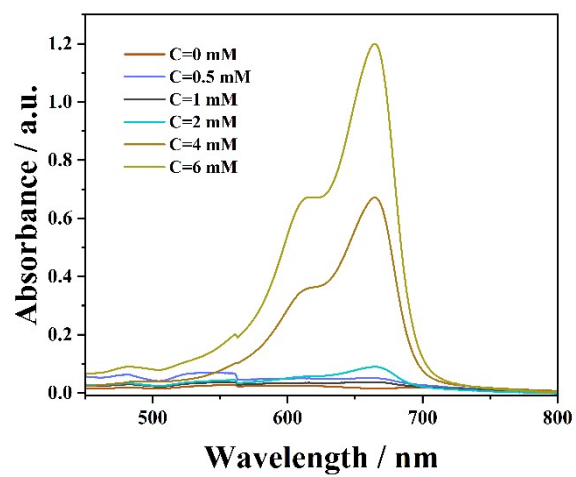

**Figure S1.** UV-vis spectra of the optimization of the concentration of MB encapsulated in UiO-66-NH<sub>2</sub>.

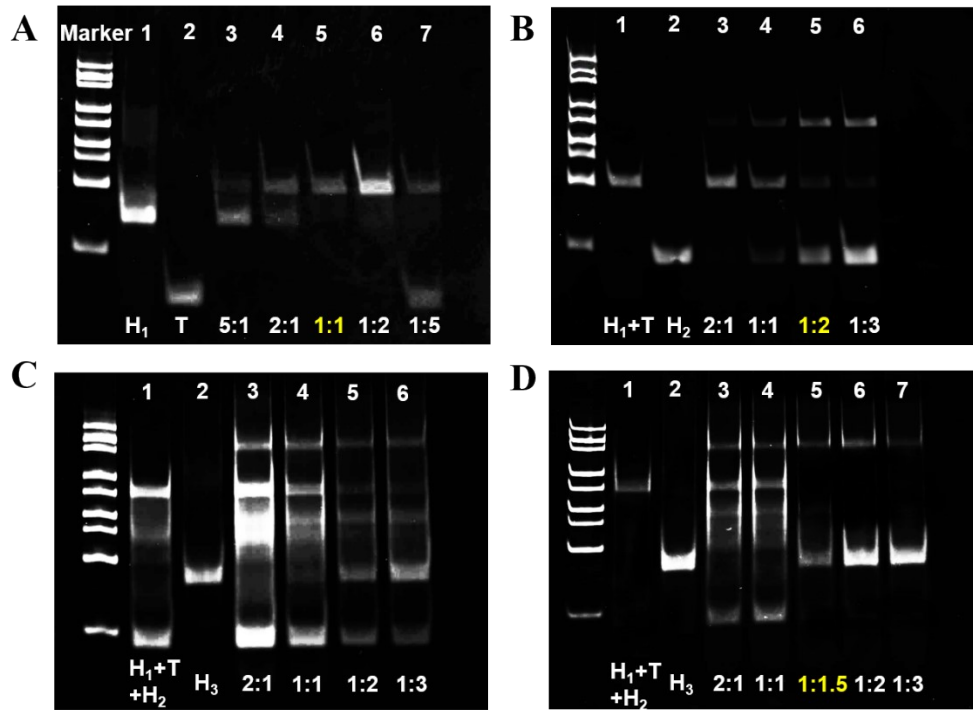

**Figure S2.** 12% native-PAGE images of the concentration ratios of  $H_1/T$  (A),  $H_1/T/H_2$  (B),  $H_1/T/H_2/H_3$  (C-D).

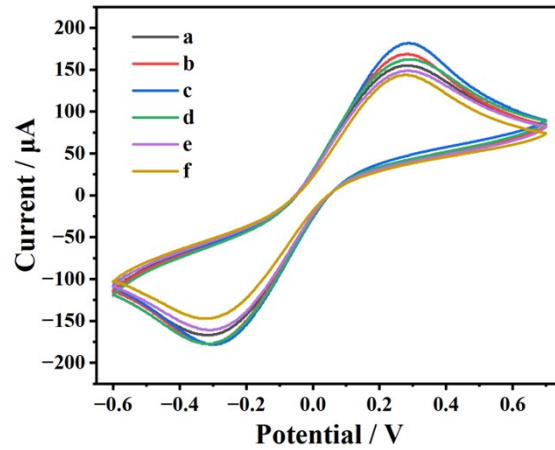

**Figure S3.** CV curves of  $[\text{Fe}(\text{CN})_6]^{3-/4-}$  at the bare screen printed carbon electrodes (SPCE) (a), UiO-66-NH<sub>2</sub>-MB/SPCE (b), UiO-66-NH<sub>2</sub>-MB/AuNPs/SPCE (c), UiO-66-NH<sub>2</sub>-MB/AuNPs/MCH/SPCE (d), UiO-66-NH<sub>2</sub>-MB/AuNPs/MCH/H<sub>1</sub>/SPCE (e), UiO-66-NH<sub>2</sub>-MB/AuNPs/MCH/H<sub>1</sub>/SPCE+ miR-21-5p+H<sub>2</sub>-Fc+H<sub>3</sub>-Fc (f) in 0.1 M KCl solution.



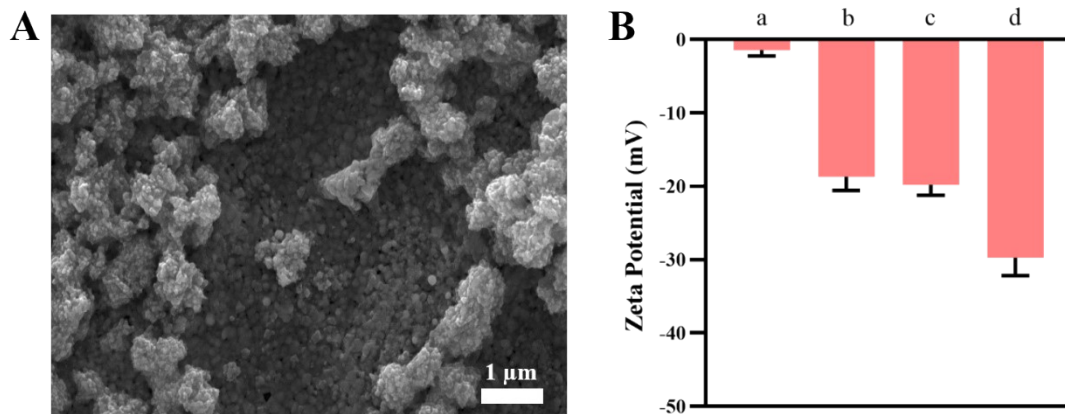

**Figure S4.** A) SEM image after deposition of AuNPs on UiO-66-NH<sub>2</sub>-MB SPCE surface. B) Zeta potential measurements of MB (a), UiO-66-NH<sub>2</sub> (b), UiO-66-NH<sub>2</sub>-MB (c) and UiO-66-NH<sub>2</sub>-MB/AuNPs (d).

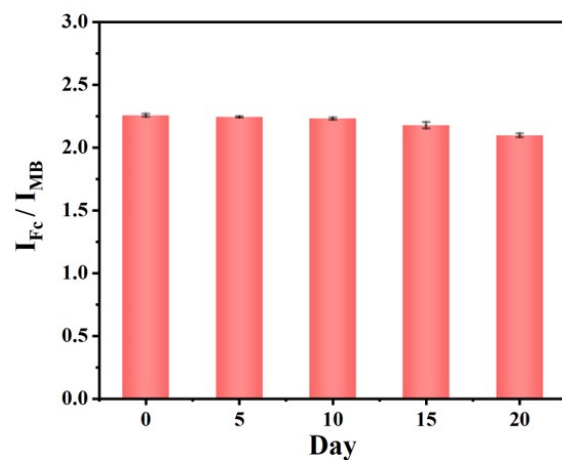

**Figure S5.** Stability testing of mechanically stabilized UiO-66-NH<sub>2</sub>-MB screen-printed carbon electrodes for the detection of miR-21-5p on different days.
